# Supplementary material
Source: MDPI journal article supplement (https://www.mdpi.com/2072-4292/16/3/514)
Supplement: s1 [file s1]

---

# Estimation of Non-Optically Active Water Quality Parameters in Zhejiang Province Based on Machine Learning

Lingfang Gao <sup>1</sup>, Yulin Shangguan <sup>1</sup>, Zhong Sun <sup>2</sup>, Qiaohui Shen <sup>2</sup> and Zhou Shi <sup>1,3,\*</sup>

<sup>1</sup> Institute of Agricultural Remote Sensing and Information Technology Application, College of Environmental and Resource Sciences, Zhejiang University, Hangzhou 310058, China; gaolingfang@zju.edu.cn (L.G.); yulinsg@zju.edu.cn (Y.S.)

<sup>2</sup> Zhejiang Ecological and Environmental Monitoring Center, Hangzhou 310012, China; sunspan1985@163.com (Z.S.); centralway@163.com (Q.S.)

<sup>3</sup> Key Laboratory of Spectroscopy Sensing, Ministry of Agriculture, Hangzhou 310058, China

\* Correspondence: shizhou@zju.edu.cn

---

### Figure captions

**Figure S1:** Oujiang River and the water quality in this river (annual mean in 2022). (a) the remote sensing image; (b) the distributions of COD<sub>Mn</sub>; (c) the distribution of DO; (d) the distribution of TN and (e) the distribution of TP.

**Figure S2:** Seasonal variation of COD<sub>Mn</sub> (a), DO (b), TN (c), and TP (d) concentrations in the Changtan Reservoir during 2022.

**Figure S3:** Seasonal variation of COD<sub>Mn</sub> (a), DO (b), TN (c), and TP (d) concentrations at river confluence during 2022.

### Table captions

**Table S1:** The daily averages of water quality parameters from 50 water quality monitoring stations (part of all stations) on January 3, 2022. T is the water temperature. DO is the dissolved oxygen. COD<sub>Mn</sub> is the permanganate index. NH<sub>3</sub>N is the ammonia nitrogen. TP is the total phosphorus. TN is the total nitrogen.

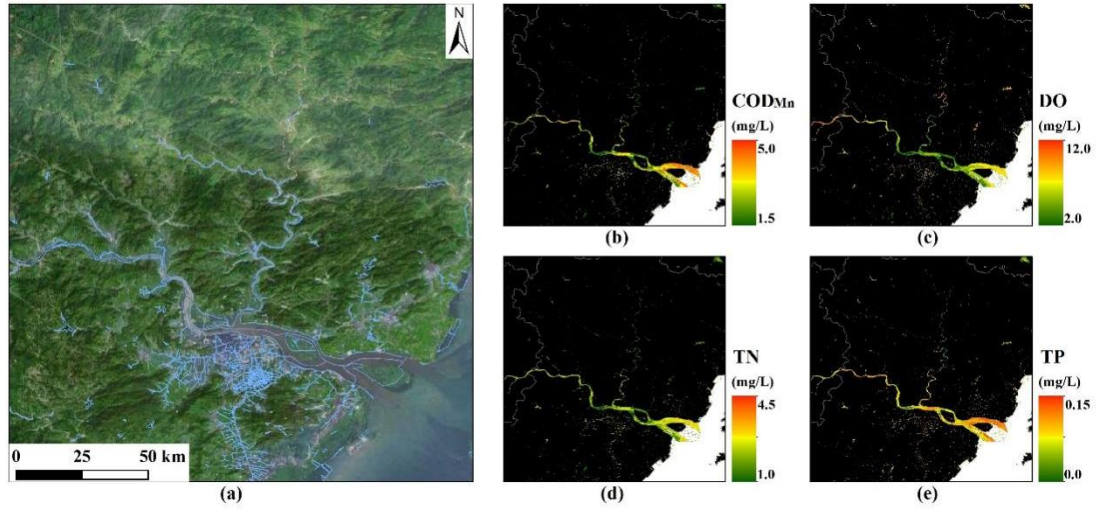

**Figure S1.** Oujiang River and the water quality in this river (annual mean in 2022). (a) the remote sensing image; (b) the distributions of COD<sub>Mn</sub>; (c) the distribution of DO; (d) the distribution of TN and (e) the distribution of TP.

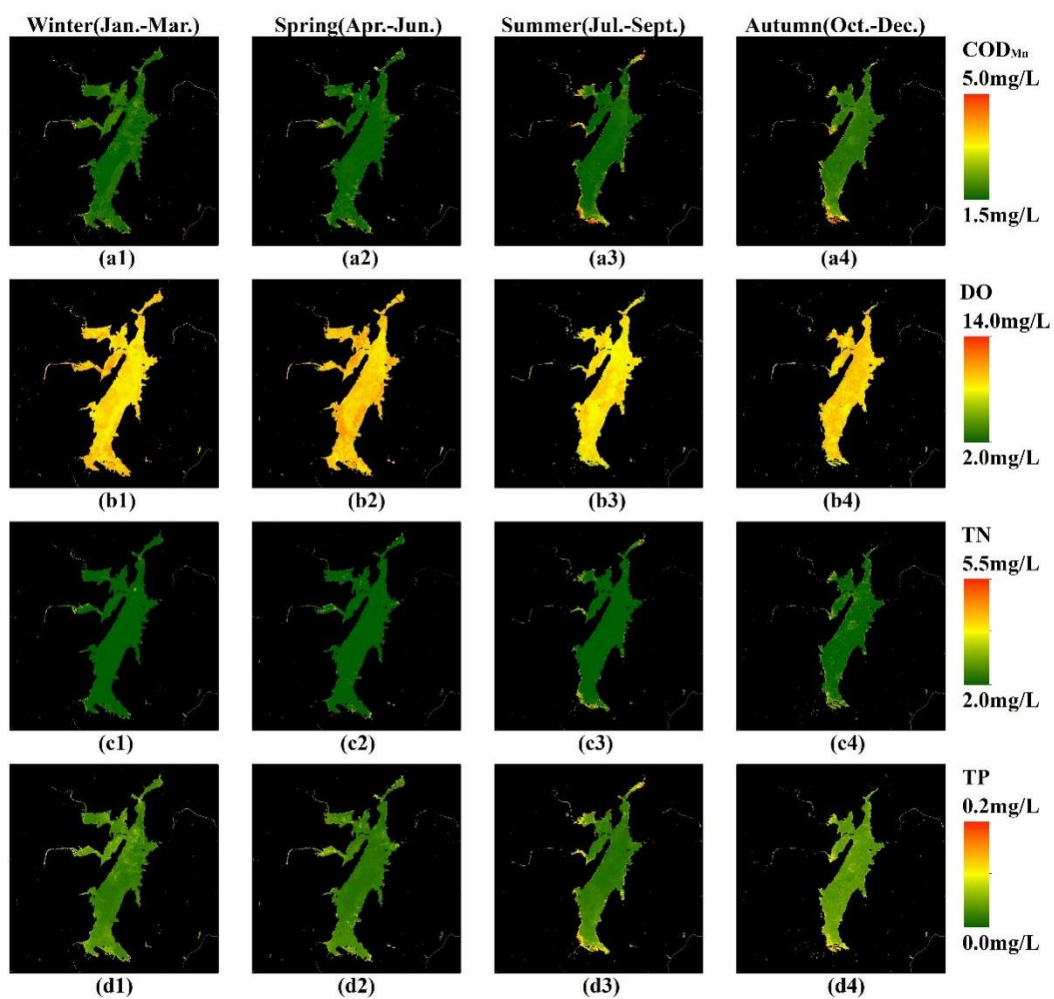

**Figure S2:** Seasonal variation of COD<sub>Mn</sub> (a), DO (b), TN (c), and TP (d) concentrations in the Changtan Reservoir during 2022.

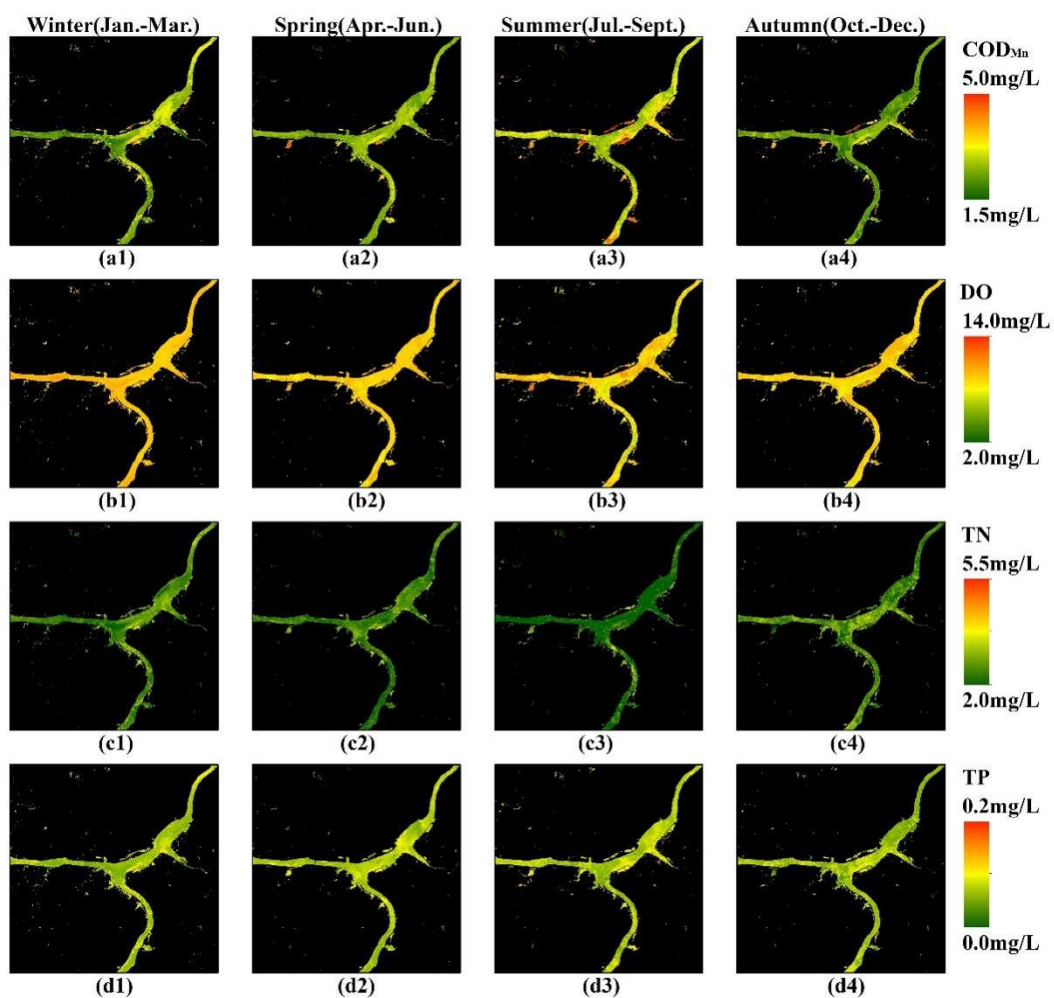

**Figure S3:** Seasonal variation of COD<sub>Mn</sub> (a), DO (b), TN (c), and TP (d) concentrations at river confluence during 2022.

**Table S1.** The daily averages of water quality parameters from 50 water quality monitoring stations (part of all stations) on January 3, 2022. T is the water temperature. DO is the dissolved oxygen. COD<sub>Mn</sub> is the permanganate index. NH<sub>3</sub>N is the ammonia nitrogen. TP is the total phosphorus. TN is the total nitrogen.

| Station | Latitude    | Longitude   | Time       | T (°C) | pH | DO (mg/L) | Turbidity (NTU) | Conductivity (uS/cm) | COD <sub>Mn</sub> (mg/L) | NH <sub>3</sub> N (mg/L) | TP (mg/L) | TN (mg/L) |
|---------|-------------|-------------|------------|--------|----|-----------|-----------------|----------------------|--------------------------|--------------------------|-----------|-----------|
| 1       | 28.0013092  | 119.9419897 | 2022-01-03 | 14.6   | 7  | 8.3       | 3.7             | 38.9                 | 1.2                      | 0.05                     | 0.01      | 0.26      |
| 2       | 28.577774   | 119.3393875 | 2022-01-03 | 17.7   | 7  | 8.9       | 2.2             | 392.2                | 1.7                      | 0.66                     | 0.051     | 4.37      |
| 3       | 28.51283273 | 120.0148743 | 2022-01-03 | 13.5   | 7  | 11.6      | 2.9             | 201.4                | 1.7                      | 0.08                     | 0.079     | 2.78      |
| 4       | 28.54077843 | 119.6521678 | 2022-01-03 | 9.2    | 7  | 10.1      | 4.7             | 66                   | 1.4                      | 0.03                     | 0.019     | 1.49      |
| 5       | 28.66335855 | 119.8131129 | 2022-01-03 | 16.8   | 7  | 8.7       | 0.7             | 73.5                 | 1.4                      | 0.06                     | 0.045     | 1.88      |
| 6       | 28.50676264 | 120.1276243 | 2022-01-03 | 8      | 8  | 10.8      | 1.1             | 66.2                 | 1.3                      | 0.02                     | 0.005     | 0.77      |
| 7       | 28.54106823 | 120.107259  | 2022-01-03 | 9      | 7  | 11.9      | 2.8             | 73.5                 | 0.9                      | 0.02                     | 0.005     | 0.47      |
| 8       | 28.89131557 | 120.3040241 | 2022-01-03 | 9.4    | 7  | 11.4      | 1.7             | 215.8                | 2.9                      | 0.12                     | 0.084     | 2.71      |
| 9       | 28.2019129  | 119.5075292 | 2022-01-03 | 14.8   | 7  | 10.4      | 2               | 66.7                 | 1.4                      | 0.1                      | 0.02      | 0.9       |
| 10      | 27.49068488 | 119.3395806 | 2022-01-03 | 9.9    | 7  | 10.1      | 6.7             | 28                   | 1                        | 0.06                     | 0.005     | 0.29      |
| 11      | 27.44050567 | 119.265648  | 2022-01-03 | 12.3   | 8  | 11.1      | 3.2             | 32                   | 0.5                      | 0.02                     | 0.008     | 0.31      |
| 12      | 28.90176965 | 120.6198376 | 2022-01-03 | 9.4    | 7  | 11.8      | 5.4             | 86                   | 0.2                      | 0.07                     | 0.005     | 1.42      |
| 13      | 29.05392611 | 120.753248  | 2022-01-03 | 8.5    | 8  | 11.2      | 4.4             | 137.3                | 0.9                      | 0.12                     | 0.025     | 1.62      |
| 14      | 29.04317944 | 121.0595143 | 2022-01-03 | 12.1   | 7  | 11.2      | 6.7             | 273                  | 1.7                      | 0.12                     | 0.02      | 3.44      |
| 15      | 28.49235461 | 121.5559827 | 2022-01-03 | 10.4   | 8  | 10.8      | 11.6            | 687.4                | 6.1                      | 1.1                      | 0.154     | 7.01      |
| 16      | 28.72034296 | 121.3541107 | 2022-01-03 | 10.4   | 9  | 13.4      | 18              | 948.5                | 6                        | 0.26                     | 0.133     | 3.4       |
| 17      | 28.51915477 | 121.3629055 | 2022-01-03 | 9.6    | 8  | 11.1      | 4.9             | 480.4                | 4.5                      | 0.56                     | 0.123     | 4.51      |
| 18      | 28.2713     | 121.1973    | 2022-01-03 | 13.7   | 8  | 11.6      | 43.7            | 3133.8               | 6.6                      | 0.02                     | 0.08      | 1.31      |
| 19      | 28.1236235  | 121.258653  | 2022-01-03 | 11.8   | 8  | 9.2       | 25              | 856                  | 5.8                      | 0.32                     | 0.12      | 5.66      |
| 20      | 29.11421904 | 121.5446516 | 2022-01-03 | 7.9    | 8  | 11.5      | 77.1            | 38075.2              | 5.6                      | 0.21                     | 0.067     | 1.78      |
| 21      | 29.04150355 | 121.6088376 | 2022-01-03 | 9.2    | 8  | 10.1      | 24.5            | 44665.6              | 4.4                      | 0.07                     | 0.028     | 0.79      |
| 22      | 30.70954253 | 120.6110946 | 2022-01-03 | 7.4    | 8  | 9.4       | 211             | 600.8                | 4.8                      | 0.45                     | 0.164     | 2.87      |
| 23      | 30.50492237 | 120.3243605 | 2022-01-03 | 9      | 7  | 9         | 79.2            | 628.5                | 3.7                      | 0.35                     | 0.126     | 4.29      |
| 24      | 30.59288654 | 120.3073996 | 2022-01-03 | 8.7    | 8  | 9.4       | 338.3           | 630.2                | 5.1                      | 0.52                     | 0.177     | 4.6       |
| 25      | 30.58692986 | 120.7059161 | 2022-01-03 | 8.8    | 8  | 10.8      | 162.9           | 668.9                | 5.2                      | 0.48                     | 0.138     | 3.79      |
| 26      | 30.56328227 | 120.6629895 | 2022-01-03 | 7.2    | 8  | 8         | 174.8           | 669.7                | 4                        | 0.69                     | 0.12      | 4.63      |
| 27      | 30.75724575 | 120.9199434 | 2022-01-03 | 7.6    | 8  | 9.1       | 58.1            | 713.5                | 3.4                      | 0.43                     | 0.094     | 4.43      |
| 28      | 30.82472782 | 120.8677844 | 2022-01-03 | 8      | 8  | 10.3      | 121             | 638.9                | 4.4                      | 0.49                     | 0.111     | 4.36      |

|    |             |             |            |      |   |      |       |       |     |      |       |      |
|----|-------------|-------------|------------|------|---|------|-------|-------|-----|------|-------|------|
| 29 | 30.82933741 | 120.8203339 | 2022-01-03 | 11.7 | 8 | 10.8 | 368   | 610   | 7.7 | 0.69 | 0.271 | 4.26 |
| 30 | 30.43292189 | 120.3326386 | 2022-01-03 | 7.9  | 8 | 7.4  | 23.2  | 741.5 | 4.2 | 1.46 | 0.196 | 4.84 |
| 31 | 31.00472132 | 120.8251525 | 2022-01-03 | 7.2  | 8 | 10.2 | 78.6  | 573.7 | 4.5 | 0.31 | 0.078 | 1.82 |
| 32 | 30.75456862 | 120.4698009 | 2022-01-03 | 6.9  | 8 | 10.4 | 107.1 | 521.8 | 4.3 | 0.35 | 0.097 | 3.06 |
| 33 | 30.59308068 | 120.7422568 | 2022-01-03 | 8.7  | 8 | 8.2  | 130.8 | 706.9 | 3.8 | 0.4  | 0.13  | 4.2  |
| 34 | 30.47089515 | 120.795615  | 2022-01-03 | 8    | 8 | 6.5  | 62.7  | 658.1 | 3.4 | 0.53 | 0.105 | 4.32 |
| 35 | 30.92259023 | 120.7121996 | 2022-01-03 | 8    | 8 | 8    | 133.7 | 592.1 | 4.7 | 0.32 | 0.086 | 1.6  |
| 36 | 30.56916919 | 120.7031279 | 2022-01-03 | 8.7  | 8 | 8.4  | 76.1  | 778.5 | 3.5 | 0.52 | 0.101 | 4.44 |
| 37 | 30.8391855  | 120.5881182 | 2022-01-03 | 7.8  | 8 | 11.1 | 47.2  | 571.3 | 3.8 | 0.27 | 0.089 | 2.13 |
| 38 | 30.62409067 | 121.0066808 | 2022-01-03 | 7.2  | 8 | 9.6  | 110.8 | 880.3 | 3.5 | 0.57 | 0.13  | 4.19 |
| 39 | 30.49217349 | 120.3956992 | 2022-01-03 | 9.6  | 7 | 8.5  | 109.5 | 748.2 | 4.9 | 0.63 | 0.172 | 3.61 |
| 40 | 30.48135773 | 120.346492  | 2022-01-03 | 9    | 7 | 8.7  | 59.5  | 594.7 | 3.4 | 0.34 | 0.108 | 4.27 |
| 41 | 29.72371506 | 121.3789    | 2022-01-03 | 8    | 7 | 11.3 | 20.6  | 244.9 | 1.7 | 0.3  | 0.1   | 3.71 |
| 42 | 30.32755962 | 119.8148596 | 2022-01-03 | 16.2 | 8 | 10.5 | 21    | 347   | 2.9 | 0.32 | 0.04  | 3.77 |
| 43 | 29.99882774 | 119.4034707 | 2022-01-03 | 13.4 | 8 | 8.5  | 13    | 277   | 1.7 | 0.04 | 0.03  | 2.03 |
| 44 | 29.89559355 | 119.8217179 | 2022-01-03 | 15.9 | 8 | 10.2 | 11    | 359   | 2.1 | 0.11 | 0.05  | 2.18 |
| 45 | 30.07206179 | 120.0858776 | 2022-01-03 | 15.8 | 8 | 10.4 | 6.8   | 398   | 2.4 | 0.12 | 0.05  | 2.45 |
| 46 | 29.68627696 | 119.6472256 | 2022-01-03 | 13.4 | 8 | 8.4  | 24    | 312   | 2   | 0.34 | 0.06  | 2.35 |
| 47 | 29.94080236 | 120.2887389 | 2022-01-03 | 13.2 | 8 | 9    | 3.7   | 216   | 2.8 | 0.9  | 0.18  | 3.3  |
| 48 | 30.084065   | 119.7411219 | 2022-01-03 | 16   | 7 | 10.5 | 20    | 321   | 2.1 | 0.21 | 0.07  | 2.12 |
| 49 | 29.76603972 | 119.9580573 | 2022-01-03 | 15.8 | 7 | 10.7 | 12    | 198   | 1.8 | 0.08 | 0.05  | 1.87 |
| 50 | 29.67104793 | 119.9209176 | 2022-01-03 | 13.4 | 8 | 11.3 | 24    | 141   | 2.4 | 0.12 | 0.06  | 2.26 |
